## Identification, Mapping and Relative Quantitation of SARS-CoV-2 Spike Glycopeptides by Mass-Retention Time Fingerprinting

Chalk, R.<sup>1</sup>, Greenland, W.<sup>2</sup>, Moreira, T.<sup>1</sup>, Coker, J.<sup>1</sup>, Mukhopadhyay S.M.M<sup>1</sup>, Williams, E.<sup>1</sup>, Manning, C.<sup>1</sup>, Bohstedt, T.<sup>1</sup>, McCrorie, R.<sup>1</sup>, Fernandez-Cid, A.<sup>1</sup>, Burgess-Brown, N.A.<sup>1</sup>

<sup>1</sup>Centre for Medicines Discovery, ORCRB, Oxford University, OX3 7DQ, UK

<sup>2</sup>Agilent Technologies, Lakeside, Cheadle Royal Business Park, Cheadle, Cheshire, SK8 3GR, UK

### Abstract

We describe a novel analytical method for rapid and robust identification, mapping and relative quantitation of glycopeptides from SARS-CoV-2 Spike protein. The method may be executed using any LC-TOF mass spectrometer, requires no specialised knowledge of glycan analysis and makes use of the differential resolving power of reversed phase HPLC. While this separation technique resolves peptides with high efficiency, glycans are resolved poorly, if at all. Consequently, glycopeptides consisting of the same peptide bearing different glycan structures will all possess very similar retention times and co-elute. While this has previously been viewed as a disadvantage, we show that shared retention time can be used to map multiple glycan species to the same peptide and location. In combination with MSMS and pseudo MS3, we have constructed a detailed mass-retention time database for Spike. This database allows any ESI-TOF equipped lab to reliably identify and quantify spike glycans from a single overnight elastase protein digest in less than 90 minutes.

Key words:

SARS-CoV-2, Spike, RBD, Glycoprotein, Glycopeptide, Glycan, Mass Spectrometry, HPLC, Database

### Introduction

Glycosylation is known to play an important role in the efficacy and antigenicity of therapeutic proteins [1-3]. The current SARS-CoV-2 pandemic has spurred urgent research, much of it devoted to preparing vaccines, therapeutic antibodies or antibody tests based on Spike protein, the virus's primary surface antigen [4]. This 145 kDa protein forms a trimer [5] with each subunit bearing twenty-two potential N-linked glycosylation sites and two O-linked sites of which approximately seventeen are occupied [5]. The unusually heavy and complex glycosylation observed in Spike protein is believed to play an important role in the pathogenicity of SARS-CoV-2 by mimicking host cell glycans and allowing the virus to evade the normal immune response [6]. Analysis of expressed Spike protein by mass spectrometry presents unique challenges in terms of its size and the number and complexity of its glycans. These challenges have been commendably met to date by laboratories with wide experience in glycan analysis and access to very sensitive, high-end nano-LC-MSMS mass spectrometers [1, 7-9]. However, in our laboratory and in others a rapid and more robust methodology is needed for routine analysis of different batches of expressed Spike protein. In addition, any method which is reliant on LC-MSMS of glycopeptides may not necessarily detect specific glycans which fail to fragment under the conditions selected. LC-MS, by contrast, generates a mass, retention time and relative abundance for all ionizable species. We have developed a simple Mass-Retention Time Fingerprinting (MRTF) method for rapid and robust identification, mapping and relative quantitation of Spike glycans. Overnight digestion using a single enzyme followed by a 65-minute LC-MS run using any accurate mass instrument are the only experimental requirements. The resulting LC-MS data contains accurate mass, retention time and relative abundance values for each glycopeptide component. This dataset needs only to be matched against the pre-existing Spike glycopeptide database reported here, as shown in Figure 1. We describe this method as "analytical mode", which is both conceptually simple to understand, and straightforward to implement in a typical mass spectrometry laboratory. For scientific completeness, we also describe the "discovery mode" which we have used to generate the data for our Mass-Retention Time Fingerprinting



**Table 1a.** Spike elastase glycopeptide mass retention time database (PCDL) containing data for 140 observed glycopeptides and data for a further 306 inferred glycopeptides (RT 2-32 min)

| Glycan posn.                                         | RT (min)  | Mass                        | Glycopeptide                | Observed/<br>Inferred | Glycan posn. | RT (min)                                  | Mass                                        | Glycopeptide            | Observed/<br>Inferred | Glycan posn.                                  | RT (min)                                      | Mass                                          | Glycopeptide                            | Observed/<br>Inferred |
|------------------------------------------------------|-----------|-----------------------------|-----------------------------|-----------------------|--------------|-------------------------------------------|---------------------------------------------|-------------------------|-----------------------|-----------------------------------------------|-----------------------------------------------|-----------------------------------------------|-----------------------------------------|-----------------------|
| N343                                                 | 2.4       | 2151.9206                   | VF <sup>N</sup> ATRF G0     | Inf                   | N717         | 10.3                                      | 1876.746                                    | PT <sup>N</sup> FT G0   | Inf                   | N343                                          | 23.295                                        | 2438.9204                                     | GEV <sup>F</sup> NAT Man8               | Obs                   |
|                                                      | 2.4       | 2297.9785                   | VF <sup>N</sup> ATRF G0F    | Inf                   |              | 10.3                                      | 2022.8039                                   | PT <sup>N</sup> FT G0F  | Inf                   |                                               | 23.399                                        | 2838.1073                                     | GEV <sup>F</sup> NAT Complex NeuAc (F)2 | Obs                   |
|                                                      | 2.4       | 1421.6562                   | VF <sup>N</sup> ATRF Man1   | Inf                   |              | 10.3                                      | 2038.7988                                   | PT <sup>N</sup> FT G1   | Inf                   |                                               | 23.762                                        | 2276.8676                                     | GEV <sup>F</sup> NAT Man7               | Obs                   |
|                                                      | 2.4       | 1583.709                    | VF <sup>N</sup> ATRF Man2   | Inf                   |              | 10.3                                      | 1146.4816                                   | PT <sup>N</sup> FT Man1 | Inf                   |                                               | 23.8                                          | 2600.9732                                     | GEV <sup>F</sup> NAT Man9               | Inf                   |
|                                                      | 2.4       | 1907.8146                   | VF <sup>N</sup> ATRF Man4   | Inf                   |              | 10.3                                      | 1308.5344                                   | PT <sup>N</sup> FT Man2 | Inf                   |                                               | 23.94                                         | 2692.0536                                     | GEV <sup>F</sup> NAT Complex NeuAc F    | Obs                   |
|                                                      | 2.4       | 2069.8674                   | VF <sup>N</sup> ATRF Man5   | Inf                   |              | 10.3                                      | 1470.5872                                   | PT <sup>N</sup> FT Man3 | Inf                   |                                               | 23.962                                        | 2114.8148                                     | GEV <sup>F</sup> NAT Man6               | Obs                   |
|                                                      | 2.4       | 2231.9202                   | VF <sup>N</sup> ATRF Man6   | Inf                   |              | 10.3                                      | 1632.64                                     | PT <sup>N</sup> FT Man4 | Inf                   |                                               | 24.203                                        | 1628.6564                                     | GEV <sup>F</sup> NAT Man3               | Obs                   |
|                                                      | 2.4       | 2393.973                    | VF <sup>N</sup> ATRF Man7   | Inf                   |              | 10.3                                      | 1794.6928                                   | PT <sup>N</sup> FT Man5 | Inf                   |                                               | 24.206                                        | 2488.9838                                     | GEV <sup>F</sup> NAT G1(F)2             | Obs                   |
|                                                      | 2.4       | 2556.0258                   | VF <sup>N</sup> ATRF Man8   | Inf                   |              | 10.3                                      | 1956.7456                                   | PT <sup>N</sup> FT Man6 | Inf                   |                                               | 24.272                                        | 2504.9787                                     | GEV <sup>F</sup> NAT G2F                | Obs                   |
|                                                      | 2.4       | 2718.0786                   | VF <sup>N</sup> ATRF Man9   | Inf                   |              | 10.3                                      | 2118.7984                                   | PT <sup>N</sup> FT Man7 | Inf                   |                                               | 24.3                                          | 1304.5508                                     | GEV <sup>F</sup> NAT Man1               | Inf                   |
| 2.464                                                | 1745.7618 | VF <sup>N</sup> ATRF Man3   | Obs                         | 10.3                  | 2280.8512    | PT <sup>N</sup> FT Man8                   | Inf                                         | 24.3                    | 1466.6036             | GEV <sup>F</sup> NAT Man2                     | Inf                                           |                                               |                                         |                       |
| N801                                                 | 3.3       | 1792.6885                   | NF <sup>S</sup> Q G0        | Inf                   | 10.3         | 2442.904                                  | PT <sup>N</sup> FT Man9                     | Inf                     | 24.349                | 1790.7092                                     | GEV <sup>F</sup> NAT Man4                     | Obs                                           |                                         |                       |
|                                                      | 3.3       | 1938.7464                   | NF <sup>S</sup> Q G0F       | Inf                   | 10.365       | 2184.8567                                 | PT <sup>N</sup> FT G1F                      | Obs                     | 24.352                | 1952.762                                      | GEV <sup>F</sup> NAT Man5                     | Obs                                           |                                         |                       |
|                                                      | 3.3       | 1872.6881                   | NF <sup>S</sup> Q Man6      | Inf                   | 10.4         | 2200.8516                                 | PT <sup>N</sup> FT G2                       | Inf                     | 24.618                | 2383.9525                                     | GEV <sup>F</sup> NAT G0F+GlcNAc               | Obs                                           |                                         |                       |
|                                                      | 3.3       | 2034.7409                   | NF <sup>S</sup> Q Man7      | Inf                   | 10.448       | 2346.9095                                 | PT <sup>N</sup> FT G2F                      | Obs                     | 24.7                  | 2196.868                                      | GEV <sup>F</sup> NAT G1                       | Inf                                           |                                         |                       |
|                                                      | 3.3       | 2196.7937                   | NF <sup>S</sup> Q Man8      | Inf                   | 11.995       | 2533.9915                                 | CLIGAEHV <sup>N</sup> NS Man6               | Obs                     | 24.7                  | 2358.9208                                     | GEV <sup>F</sup> NAT G2                       | Inf                                           |                                         |                       |
|                                                      | 3.3       | 2358.8465                   | NF <sup>S</sup> Q Man9      | Inf                   | 12.1         | 2453.9919                                 | CLIGAEHV <sup>N</sup> NS G0                 | Inf                     | 24.713                | 2342.9259                                     | GEV <sup>F</sup> NAT G1F                      | Obs                                           |                                         |                       |
|                                                      | 3.364     | 1710.6353                   | NF <sup>S</sup> Q Man5      | Obs                   | 12.1         | 2600.0498                                 | CLIGAEHV <sup>N</sup> NS G0F                | Inf                     | 24.9                  | 2034.8152                                     | GEV <sup>F</sup> NAT G0                       | Inf                                           |                                         |                       |
|                                                      | 3.8       | 1062.4241                   | NF <sup>S</sup> Q Man1      | Inf                   | 12.105       | 2371.9387                                 | CLIGAEHV <sup>N</sup> NS Man5               | Obs                     | 24.967                | 2180.8731                                     | GEV <sup>F</sup> NAT G0F                      | Obs                                           |                                         |                       |
|                                                      | 3.8       | 1224.4769                   | NF <sup>S</sup> Q Man2      | Inf                   | 12.204       | 2209.8859                                 | CLIGAEHV <sup>N</sup> NS Man4               | Obs                     | 25                    | 2237.8946                                     | GEV <sup>F</sup> NAT G0+GlcNAc                | Inf                                           |                                         |                       |
|                                                      | 3.888     | 1548.5825                   | NF <sup>S</sup> Q Man4      | Obs                   | 13.161       | 2825.0954                                 | EF <sup>R</sup> VYSSAN <sup>N</sup> CT Man6 | Obs                     | 25.323                | 2383.9525                                     | GEV <sup>F</sup> NAT G0F+GlcNAc               | Obs                                           |                                         |                       |
| 3.898                                                | 1386.5297 | NF <sup>S</sup> Q Man3      | Obs                         | 13.4                  | 2745.0958    | EF <sup>R</sup> VYSSAN <sup>N</sup> CT G0 | Inf                                         | 25.4                    | 2650.0162             | GEV <sup>F</sup> NAT A1                       | Inf                                           |                                               |                                         |                       |
| N17/234/311 ambiguous assignment (isobaric peptides) | 5.636     | 2210.8192                   | NL/IT Man9                  | Obs                   | 13.4         | 2891.1537                                 | EF <sup>R</sup> VYSSAN <sup>N</sup> CT G0F  | Inf                     | 25.4                  | 2941.1116                                     | GEV <sup>F</sup> NAT A2                       | Inf                                           |                                         |                       |
|                                                      | 5.7       | 752.344                     | NL/IT (GlcNAc)2             | Inf                   | 13.4         | 2014.8314                                 | EF <sup>R</sup> VYSSAN <sup>N</sup> CT Man1 | Inf                     | 25.476                | 2983.1586                                     | GEV <sup>F</sup> NAT A1(F)2-Gal+GlcNAc        | Obs                                           |                                         |                       |
|                                                      | 5.7       | 549.2646                    | NL/IT GlcNAc stump          | Inf                   | 13.4         | 2176.8842                                 | EF <sup>R</sup> VYSSAN <sup>N</sup> CT Man2 | Inf                     | 25.492                | 2796.0741                                     | GEV <sup>F</sup> NAT A1F                      | Obs                                           |                                         |                       |
|                                                      | 5.7       | 1644.6612                   | NL/IT GO                    | Inf                   | 13.4         | 2338.937                                  | EF <sup>R</sup> VYSSAN <sup>N</sup> CT Man3 | Inf                     | 25.734                | 2837.1007                                     | GEV <sup>F</sup> NAT A1F-Gal+GlcNAc           | Obs                                           |                                         |                       |
|                                                      | 5.7       | 1790.7191                   | NL/IT G0F                   | Inf                   | 13.4         | 2500.9898                                 | EF <sup>R</sup> VYSSAN <sup>N</sup> CT Man4 | Inf                     | 25.771                | 3087.1695                                     | GEV <sup>F</sup> NAT A2F                      | Obs                                           |                                         |                       |
|                                                      | 5.7       | 914.3968                    | NL/IT Man1                  | Inf                   | 13.4         | 2987.1482                                 | EF <sup>R</sup> VYSSAN <sup>N</sup> CT Man7 | Inf                     | 25.9                  | 1142.49791                                    | GEV <sup>F</sup> NAT (GlcNAc)2                | Inf                                           |                                         |                       |
|                                                      | 5.7       | 1076.4496                   | NL/IT Man2                  | Inf                   | 13.4         | 3149.201                                  | EF <sup>R</sup> VYSSAN <sup>N</sup> CT Man8 | Inf                     | 25.9                  | 939.4186                                      | GEV <sup>F</sup> NAT GlcNAc stump             | Inf                                           |                                         |                       |
|                                                      | 5.7       | 1238.5024                   | NL/IT Man3                  | Inf                   | 13.4         | 3311.2538                                 | EF <sup>R</sup> VYSSAN <sup>N</sup> CT Man9 | Inf                     | 25.9555               | 736.33917                                     | GEV <sup>F</sup> NAT peptide                  | Obs                                           |                                         |                       |
|                                                      | 5.7       | 346.1852                    | NL/IT peptide               | Inf                   | 13.446       | 2663.0426                                 | EF <sup>R</sup> VYSSAN <sup>N</sup> CT Man5 | Obs                     | 26.023                | 2634.0213                                     | GEV <sup>F</sup> NAT A1F-Gal                  | Obs                                           |                                         |                       |
|                                                      | 5.737     | 2048.7664                   | NL/IT Man8                  | Obs                   | 19.8         | 3001.1428                                 | YSSAN <sup>N</sup> CTFEYVS G1               | Inf                     | 26.101                | 3109.1451                                     | GEV <sup>F</sup> NAT Very Complex             | Obs                                           |                                         |                       |
| 5.751                                                | 1886.7136 | NL/IT Man7                  | Obs                         | 19.852                | 3147.2007    | YSSAN <sup>N</sup> CTFEYVS G1F            | Obs                                         | 25.198                  | 1545.693              | GP2                                           | Obs                                           |                                               |                                         |                       |
| 5.761                                                | 1724.6608 | NL/IT Man6                  | Obs                         | 20.2                  | 2839.09      | YSSAN <sup>N</sup> CTFEYVS G0             | Inf                                         | 25.587                  | 2173.9303             | GP2+628.0                                     | Obs                                           |                                               |                                         |                       |
| 5.821                                                | 1562.608  | NL/IT Man5                  | Obs                         | 20.2                  | 2108.8256    | YSSAN <sup>N</sup> CTFEYVS Man1           | Inf                                         | N343                    | 25.2                  | 2123.8516                                     | (G)EV <sup>F</sup> NAT G0F                    | Inf                                           |                                         |                       |
| 6.549                                                | 1400.5552 | NL/IT Man4                  | Obs                         | 20.2                  | 2270.8795    | YSSAN <sup>N</sup> CTFEYVS Man2           | Inf                                         |                         | 25.2                  | 1895.7405                                     | (G)EV <sup>F</sup> NAT Man5                   | Inf                                           |                                         |                       |
| N801                                                 | 6.4       | 2187.8412                   | DFGGFN <sup>S</sup> G0      | Inf                   | 20.2         | 2432.9312                                 | YSSAN <sup>N</sup> CTFEYVS Man3             |                         | Inf                   | 25.203                                        | 1977.7937                                     | (G)EV <sup>F</sup> NAT G0                     | Obs                                     |                       |
|                                                      | 6.4       | 2333.8991                   | DFGGFN <sup>S</sup> G0F     | Inf                   | 20.2         | 2594.984                                  | YSSAN <sup>N</sup> CTFEYVS Man4             |                         | Inf                   | 26.5                                          | 1933.7675                                     | GEV <sup>F</sup> NAT(G) G0                    | Inf                                     |                       |
|                                                      | 6.4       | 1457.5722                   | DFGGFN <sup>S</sup> Man1    | Inf                   | 20.2         | 2757.0368                                 | YSSAN <sup>N</sup> CTFEYVS Man5             |                         | Inf                   | 26.5                                          | 2079.8254                                     | GEV <sup>F</sup> NAT(G) G0F                   | Inf                                     |                       |
|                                                      | 6.4       | 1619.625                    | DFGGFN <sup>S</sup> Man2    | Inf                   | 20.2         | 2919.0896                                 | YSSAN <sup>N</sup> CTFEYVS Man6             |                         | Inf                   | 26.506                                        | 1851.7143                                     | GEV <sup>F</sup> NAT(T) Man5                  | Obs                                     |                       |
|                                                      | 6.4       | 1781.6778                   | DFGGFN <sup>S</sup> Man3    | Inf                   | 20.2         | 3081.1424                                 | YSSAN <sup>N</sup> CTFEYVS Man7             |                         | Inf                   | 27.039                                        | 3295.3341                                     | GGVSVITPG <sup>T</sup> NS <sup>N</sup> Q Man9 | Obs                                     |                       |
|                                                      | 6.4       | 1943.7352                   | DFGGFN <sup>S</sup> Man4    | Inf                   | 20.2         | 3243.1952                                 | YSSAN <sup>N</sup> CTFEYVS Man8             |                         | Inf                   | 27.6                                          | 2729.1761                                     | GGVSVITPG <sup>T</sup> NS <sup>N</sup> Q G0   | Inf                                     |                       |
|                                                      | 6.4       | 2267.8408                   | DFGGFN <sup>S</sup> Man6    | Inf                   | 20.2         | 3405.248                                  | YSSAN <sup>N</sup> CTFEYVS Man9             |                         | Inf                   | 27.6                                          | 2875.234                                      | GGVSVITPG <sup>T</sup> NS <sup>N</sup> Q G0F  | Inf                                     |                       |
|                                                      | 6.4       | 2429.889                    | DFGGFN <sup>S</sup> Man7    | Inf                   | 20.29        | 2985.1479                                 | YSSAN <sup>N</sup> CTFEYVS G0F              |                         | Inf                   | 27.6                                          | 1998.9117                                     | GGVSVITPG <sup>T</sup> NS <sup>N</sup> Q Man1 | Inf                                     |                       |
|                                                      | 6.4       | 2591.9418                   | DFGGFN <sup>S</sup> Man8    | Inf                   | 20.61        | 2744.1259                                 | GP1+Hex2                                    | Inf                     | 27.6                  | 2160.9645                                     | GGVSVITPG <sup>T</sup> NS <sup>N</sup> Q Man2 | Inf                                           |                                         |                       |
|                                                      | 6.4       | 2753.9946                   | DFGGFN <sup>S</sup> Man9    | Inf                   | 20.926       | 2780.0707                                 | GP1+360.1                                   | Obs                     | 27.6                  | 2323.0173                                     | GGVSVITPG <sup>T</sup> NS <sup>N</sup> Q Man3 | Inf                                           |                                         |                       |
| 6.454                                                | 2105.7834 | DFGGFN <sup>S</sup> Man5    | Obs                         | 21.144                | 2420.0129    | GP1                                       | Obs                                         | 27.6                    | 2485.0701             | GGVSVITPG <sup>T</sup> NS <sup>N</sup> Q Man4 | Inf                                           |                                               |                                         |                       |
| N149                                                 | 6.537     | 1725.6561                   | NKS Man6                    | Obs                   | 21.41        | 2456.9655                                 | GP1+37.0                                    | Obs                     | 27.6                  | 2647.1229                                     | GGVSVITPG <sup>T</sup> NS <sup>N</sup> Q Man5 | Inf                                           |                                         |                       |
|                                                      | 6.554     | 1563.6033                   | NKS Man5                    | Obs                   | 20.8         | 2676.0267                                 | SSAN <sup>N</sup> CTFEYVS G0                | Inf                     | 27.6                  | 2809.1757                                     | GGVSVITPG <sup>T</sup> NS <sup>N</sup> Q Man6 | Inf                                           |                                         |                       |
|                                                      | 7.2       | 1645.6565                   | NKS G0                      | Inf                   | 20.8         | 1945.7623                                 | SSAN <sup>N</sup> CTFEYVS Man1              | Inf                     | 27.6                  | 2971.2285                                     | GGVSVITPG <sup>T</sup> NS <sup>N</sup> Q Man7 | Inf                                           |                                         |                       |
|                                                      | 7.2       | 1791.7144                   | NKS G0F                     | Inf                   | 20.8         | 2107.8151                                 | SSAN <sup>N</sup> CTFEYVS Man2              | Inf                     | 27.627                | 3133.2813                                     | GGVSVITPG <sup>T</sup> NS <sup>N</sup> Q Man8 | Obs                                           |                                         |                       |
|                                                      | 7.2       | 915.3921                    | NKS Man1                    | Inf                   | 20.8         | 2769.8679                                 | SSAN <sup>N</sup> CTFEYVS Man3              | Inf                     | N165                  | 27.7                                          | 3092.2109                                     | MESEFRVYSSAN <sup>N</sup> CT G0               | Inf                                     |                       |
|                                                      | 7.2       | 1077.4449                   | NKS Man2                    | Inf                   | 20.8         | 2431.9207                                 | SSAN <sup>N</sup> CTFEYVS Man4              | Inf                     |                       | 27.7                                          | 3238.2688                                     | MESEFRVYSSAN <sup>N</sup> CT G0F              | Inf                                     |                       |
|                                                      | 7.2       | 1239.4977                   | NKS Man3                    | Inf                   | 20.8         | 2593.9735                                 | SSAN <sup>N</sup> CTFEYVS Man5              | Inf                     |                       | 27.7                                          | 2361.9465                                     | MESEFRVYSSAN <sup>N</sup> CT Man1             | Inf                                     |                       |
|                                                      | 7.2       | 1401.5505                   | NKS Man4                    | Inf                   | 20.8         | 2756.0263                                 | SSAN <sup>N</sup> CTFEYVS Man6              | Inf                     |                       | 27.7                                          | 2523.9993                                     | MESEFRVYSSAN <sup>N</sup> CT Man2             | Inf                                     |                       |
|                                                      | 7.2       | 1887.7089                   | NKS Man7                    | Inf                   | 20.8         | 2918.0791                                 | SSAN <sup>N</sup> CTFEYVS Man7              | Inf                     |                       | 27.7                                          | 2686.0521                                     | MESEFRVYSSAN <sup>N</sup> CT Man3             | Inf                                     |                       |
|                                                      | 7.2       | 2049.7617                   | NKS Man8                    | Inf                   | 20.8         | 3080.1319                                 | SSAN <sup>N</sup> CTFEYVS Man8              | Inf                     |                       | 27.7                                          | 2848.1049                                     | MESEFRVYSSAN <sup>N</sup> CT Man4             | Inf                                     |                       |
| 7.2                                                  | 2211.8145 | NKS Man9                    | Inf                         | 20.8                  | 3242.1847    | SSAN <sup>N</sup> CTFEYVS Man9            | Inf                                         | 27.7                    |                       | 3172.2105                                     | MESEFRVYSSAN <sup>N</sup> CT Man6             | Inf                                           |                                         |                       |
| 7.271                                                | 1563.6033 | NKS Man5                    | Obs                         | 20.881                | 2822.0846    | SSAN <sup>N</sup> CTFEYVS G0F             | Obs                                         | 27.7                    |                       | 3334.2633                                     | MESEFRVYSSAN <sup>N</sup> CT Man7             | Inf                                           |                                         |                       |
| N282                                                 | 7         | 2323.9062                   | YNE <sup>N</sup> GTITD G0   | Inf                   | 20.9         | 2457.9939                                 | QDV <sup>N</sup> CTEVPV G0                  | Inf                     |                       | 27.7                                          | 3496.3161                                     | MESEFRVYSSAN <sup>N</sup> CT Man8             | Inf                                     |                       |
|                                                      | 7         | 2469.9641                   | YNE <sup>N</sup> GTITD G0F  | Inf                   | 20.9         | 1727.7295                                 | QDV <sup>N</sup> CTEVPV Man1                | Inf                     |                       | 27.7                                          | 3608.3689                                     | MESEFRVYSSAN <sup>N</sup> CT Man9             | Inf                                     |                       |
|                                                      | 7         | 2485.959                    | YNE <sup>N</sup> GTITD G1   | Inf                   | 20.9         | 1889.7823                                 | QDV <sup>N</sup> CTEVPV Man2                | Inf                     | 27.778                | 3010.1577                                     | MESEFRVYSSAN <sup>N</sup> CT Man5             | Obs                                           |                                         |                       |
|                                                      | 7         | 2632.0169                   | YNE <sup>N</sup> GTITD G1F  | Inf                   | 20.9         | 2051.8351                                 | QDV <sup>N</sup> CTEVPV Man3                | Inf                     | GP3                   | 27.785                                        | 2971.2343                                     | GP3+GlcNAc                                    | Obs                                     |                       |
|                                                      | 7         | 2794.0697                   | YNE <sup>N</sup> GTITD G2F  | Inf                   | 20.9         | 2213.8879                                 | QDV <sup>N</sup> CTEVPV Man4                | Inf                     |                       | 28.022                                        | 2768.1567                                     | GP3                                           | Obs                                     |                       |
|                                                      | 7         | 1593.6418                   | YNE <sup>N</sup> GTITD Man1 | Inf                   | 20.9         | 2375.9407                                 | QDV <sup>N</sup> CTEVPV Man5                | Inf                     |                       | N801                                          | 29.861                                        | 2703.1208                                     | PPKIDGGFN <sup>S</sup> Man6             | Obs                   |
|                                                      | 7         | 1755.6946                   | YNE <sup>N</sup> GTITD Man2 | Inf                   | 20.9         | 2537.9935                                 | QDV <sup>N</sup> CTEVPV Man6                | Inf                     |                       |                                               | 30.5                                          | 2623.1212                                     | PPKIDGGFN <sup>S</sup> G0               | Inf                   |
|                                                      | 7         | 1917.7474                   | YNE <sup>N</sup> GTITD Man3 | Inf                   | 20.9         | 2700.0463                                 | QDV <sup>N</sup> CTEVPV Man7                | Inf                     |                       |                                               | 30.5                                          | 2769.1791                                     | PPKIDGGFN <sup>S</sup> G0F              | Inf                   |
|                                                      | 7         | 2079.8002                   | YNE <sup>N</sup> GTITD Man4 | Inf                   | 20.9         | 2862.0991                                 | QDV <sup>N</sup> CTEVPV Man8                | Inf                     |                       |                                               | 30.5                                          | 2054.9096                                     | PPKIDGGFN <sup>S</sup> Man2             | Inf                   |
|                                                      | 7         | 2241.853                    | YNE <sup>N</sup> GTITD Man5 | Inf                   | 20.9         | 3024.1519                                 | QDV <sup>N</sup> CTEVPV Man9                | Inf                     |                       |                                               | 30.5                                          | 2216.9624                                     | PPKIDGGFN <sup>S</sup> Man3             | Inf                   |
| 7                                                    | 2403.9058 | YNE <sup>N</sup> GTITD Man6 | Inf                         | 20.982                | 2604.0518    | QDV <sup>N</sup> CTEVPV G0F               | Obs                                         | 30.5                    |                       |                                               | 2379.0152                                     | PPKIDGGFN <sup>S</sup> Man4                   | Inf                                     |                       |
| 7                                                    | 2565.9586 | YNE <sup>N</sup> GTITD Man7 | Inf                         | 21.2                  | 2677.0431    | NE <sup>N</sup> GTITDAVDCA G0             | Inf                                         | 30.5                    |                       |                                               | 2541.068                                      | PPKIDGGFN <sup>S</sup> Man5                   | Inf                                     |                       |
| 7                                                    | 2728.0114 | YNE <sup>N</sup> GTITD Man8 | Inf                         | 21.2                  | 1946.7787    | NE <sup>N</sup> GTITDAVDCA Man1           | Inf                                         | 30.5                    |                       |                                               | 2865.1736                                     | PPKIDGGFN <sup>S</sup> Man7                   | Inf                                     |                       |
| 7                                                    | 2890.0642 | YNE <sup>N</sup> GTITD Man9 | Inf                         | 21.2                  | 2108.8315    | NE <sup>N</sup> GTITDAVDCA Man2           | Inf                                         | 30.5                    | 3027.2264             |                                               | PPKIDGGFN <sup>S</sup> Man8                   | Inf                                           |                                         |                       |
| 7.054                                                | 2648.0118 | YNE <sup>N</sup> GTITD G2   | Obs                         | 21.2                  | 2270.8843    | NE <sup>N</sup> GTITDAVDCA Man3           | Inf                                         | 30.5                    | 3189.2792             |                                               | PPKIDGGFN <sup>S</sup> Man9                   | Inf                                           |                                         |                       |
| N282                                                 | 8.082     | 2120.8366                   | NGTITDAVD Man5              | Obs                   |              |                                           |                                             |                         |                       |                                               |                                               |                                               |                                         |                       |

**Table 1b.** Spike elastase glycopeptide mass retention time database (PCDL) containing data for 140 observed glycopeptides and data for a further 306 inferred glycopeptides (RT 32-60 min and key)

| Glycan posn. | RT (min)  | Mass                    | Glycopeptide                   | Observed/<br>Inferred |     |
|--------------|-----------|-------------------------|--------------------------------|-----------------------|-----|
| N149         | 32.4      | 3333.3262               | YYYYHKNKSWM Man9               | Inf                   |     |
|              | 32.463    | 2847.1678               | YYYYHKNKSWM Man6               | Obs                   |     |
|              | 32.463    | 3171.2734               | YYYYHKNKSWM Man8               | Obs                   |     |
|              | 32.6      | 2767.1682               | YYYYHKNKSWM GO                 | Inf                   |     |
|              | 32.6      | 2913.2261               | YYYYHKNKSWM GOF                | Inf                   |     |
|              | 32.6      | 2036.9038               | YYYYHKNKSWM Man1               | Inf                   |     |
|              | 32.6      | 2198.9566               | YYYYHKNKSWM Man2               | Inf                   |     |
|              | 32.6      | 2361.0094               | YYYYHKNKSWM Man3               | Inf                   |     |
|              | 32.6      | 2523.0622               | YYYYHKNKSWM Man4               | Inf                   |     |
|              | 32.6      | 2685.115                | YYYYHKNKSWM Man5               | Inf                   |     |
|              | 32.682    | 3009.2206               | YYYYHKNKSWM Man7               | Obs                   |     |
|              | GP4       | 33.611                  | 2694.1185                      | GP4 Man6              | Obs |
| 33.8         |           | 2760.1768               | GP4 GOF                        | Inf                   |     |
| 33.819       |           | 2532.0657               | GP4 Man5                       | Obs                   |     |
| N17          | 32.463    | 2828.1148               | CVNLTTRT Man9                  | Obs                   |     |
|              | 33.8      | 2261.9568               | CVNLTTRT GO                    | Inf                   |     |
|              | 33.8      | 2408.0147               | CVNLTTRT GOF                   | Inf                   |     |
|              | 33.8      | 1531.6924               | CVNLTTRT Man1                  | Inf                   |     |
|              | 33.8      | 1693.7452               | CVNLTTRT Man2                  | Inf                   |     |
|              | 33.8      | 1855.798                | CVNLTTRT Man3                  | Inf                   |     |
|              | 33.8      | 2017.8508               | CVNLTTRT Man4                  | Inf                   |     |
|              | 33.8      | 2179.9036               | CVNLTTRT Man5                  | Inf                   |     |
|              | 33.8      | 2341.9564               | CVNLTTRT Man6                  | Inf                   |     |
|              | 33.8      | 2504.0092               | CVNLTTRT Man7                  | Inf                   |     |
| 33.841       | 2666.062  | CVNLTTRT Man8           | Obs                            |                       |     |
| N343         | 34.6      | 1848.7511               | VFNAT GO                       | Inf                   |     |
|              | 34.6      | 1994.809                | VFNAT GOF                      | Inf                   |     |
|              | 34.6      | 1118.4867               | VFNAT Man1                     | Inf                   |     |
|              | 34.6      | 1280.5395               | VFNAT Man2                     | Inf                   |     |
|              | 34.6      | 1442.5923               | VFNAT Man3                     | Inf                   |     |
|              | 34.6      | 2252.8563               | VFNAT Man8                     | Inf                   |     |
|              | 34.6      | 2414.9091               | VFNAT Man9                     | Inf                   |     |
|              | 34.656    | 1928.7507               | VFNAT Man6                     | Obs                   |     |
|              | 34.674    | 2090.8035               | VFNAT Man7                     | Obs                   |     |
|              | 34.682    | 1766.6979               | VFNAT Man5                     | Obs                   |     |
|              | 34.688    | 1604.6451               | VFNAT Man4                     | Obs                   |     |
|              | N717      | 35.101                  | 2195.8349                      | NFTI Man8             | Obs |
| 35.353       |           | 1709.6765               | NFTI Man5                      | Obs                   |     |
| 35.373       |           | 1385.5709               | NFTI Man3                      | Obs                   |     |
| 35.374       |           | 2033.7821               | NFTI Man7                      | Obs                   |     |
| 35.8         |           | 2357.8877               | NFTI Man9                      | Inf                   |     |
| 35.86        |           | 1871.7293               | NFTI Man6                      | Obs                   |     |
| 36.2         |           | 2406.9307               | NFTI A1                        | Inf                   |     |
| 36.2         |           | 2552.9886               | NFTI A1F                       | Inf                   |     |
| 36.2         |           | 2068.0261               | NFTI A2                        | Inf                   |     |
| 36.2         |           | 2844.084                | NFTI A2F                       | Inf                   |     |
| 36.2         |           | 1791.7297               | NFTI GO                        | Inf                   |     |
| 36.2         |           | 1994.8091               | NFTI GO +GlcNAc                | Obs                   |     |
| 36.2         | 2140.867  | NFTI GOF +GlcNAc        | Obs                            |                       |     |
| 36.2         | 1953.7825 | NFTI G1                 | Inf                            |                       |     |
| 36.2         | 2115.8353 | NFTI G2                 | Inf                            |                       |     |
| 36.2         | 2261.8932 | NFTI G2F                | Inf                            |                       |     |
| 36.2         | 1061.4653 | NFTI Man1               | Inf                            |                       |     |
| 36.2         | 1223.5181 | NFTI Man2               | Inf                            |                       |     |
| 36.295       | 1547.6237 | NFTI Man4               | Obs                            |                       |     |
| 36.599       | 2099.8404 | NFTI G1F                | Obs                            |                       |     |
| 36.77        | 2089.8308 | NFTI Man5+380.2         | Obs                            |                       |     |
| 36.896       | 1937.7876 | NFTI GOF                | Obs                            |                       |     |
| N61          | 35.4      | 2765.11                 | PFFSNVTW G2F                   | Inf                   |     |
|              | 35.4      | 1564.6821               | PFFSNVTW Man1                  | Inf                   |     |
|              | 35.4      | 1726.7349               | PFFSNVTW Man2                  | Inf                   |     |
|              | 35.4      | 1888.7877               | PFFSNVTW Man3                  | Inf                   |     |
|              | 35.4      | 2050.8405               | PFFSNVTW Man4                  | Inf                   |     |
|              | 35.4      | 2212.8933               | PFFSNVTW Man5                  | Inf                   |     |
|              | 35.4      | 2536.9989               | PFFSNVTW Man7                  | Inf                   |     |
|              | 35.4      | 2699.0517               | PFFSNVTW Man8                  | Inf                   |     |
|              | 35.4      | 2861.1045               | PFFSNVTW Man9                  | Inf                   |     |
|              | 35.437    | 2619.0521               | PFFSNVTW G2                    | Obs                   |     |
|              | 35.601    | 2456.9993               | PFFSNVTW G1                    | Obs                   |     |
|              | 36        | 2498.0259               | PFFSNVTW GO +GlcNAc            | Inf                   |     |
| 36           | 2441.0044 | PFFSNVTW GOF            | Inf                            |                       |     |
| 36           | 2644.0838 | PFFSNVTW GOF +GlcNAc    | Inf                            |                       |     |
| 36           | 2603.0572 | PFFSNVTW G1F            | Inf                            |                       |     |
| 36.025       | 2294.9465 | PFFSNVTW GO             | Obs                            |                       |     |
| 36.854       | 2374.9461 | PFFSNVTW Man6           | Obs                            |                       |     |
| N343         | 36.5      | 2181.8836               | FGEVFNAT GO                    | Inf                   |     |
|              | 36.5      | 2327.9415               | FGEVFNAT GOF                   | Inf                   |     |
|              | 36.5      | 1451.6192               | FGEVFNAT Man1                  | Inf                   |     |
|              | 36.5      | 1613.672                | FGEVFNAT Man2                  | Inf                   |     |
|              | 36.5      | 1775.7248               | FGEVFNAT Man3                  | Inf                   |     |
|              | 36.5      | 1937.7776               | FGEVFNAT Man4                  | Inf                   |     |
|              | 36.5      | 2261.8832               | FGEVFNAT Man6                  | Inf                   |     |
|              | 36.5      | 2423.936                | FGEVFNAT Man7                  | Inf                   |     |
|              | 36.5      | 2585.9888               | FGEVFNAT Man8                  | Inf                   |     |
|              | 36.5      | 2748.0416               | FGEVFNAT Man9                  | Inf                   |     |
|              | 36.528    | 2099.8304               | FGEVFNAT Man5                  | Obs                   |     |
|              | N343      | 36.8                    | 2552.0511                      | LCPFGEVFNAT GO        | Inf |
| 36.8         |           | 2698.109                | LCPFGEVFNAT GOF                | Inf                   |     |
| 36.8         |           | 1821.7867               | LCPFGEVFNAT Man1               | Inf                   |     |
| 36.8         |           | 1983.8395               | LCPFGEVFNAT Man2               | Inf                   |     |
| 36.8         |           | 2145.8923               | LCPFGEVFNAT Man3               | Inf                   |     |
| 36.8         |           | 2307.9451               | LCPFGEVFNAT Man4               | Inf                   |     |
| 36.8         |           | 2469.9979               | LCPFGEVFNAT Man5               | Inf                   |     |
| 36.8         |           | 2794.1035               | LCPFGEVFNAT Man7               | Inf                   |     |
| 36.8         |           | 2956.1563               | LCPFGEVFNAT Man8               | Inf                   |     |
| 36.8         |           | 3118.2091               | LCPFGEVFNAT Man9               | Inf                   |     |
| 36.864       |           | 2632.0507               | LCPFGEVFNAT Man6               | Obs                   |     |
| GP6          |           | 40.948                  | 1570.7208                      | GP6                   | Obs |
|              | 41.645    | 1881.7363               | GP6 +311.0                     | Obs                   |     |
|              | 42.6      | 1855.7569               | PNITN GO                       | Inf                   |     |
| N331         | 42.6      | 2001.8148               | PNITN GOF                      | Inf                   |     |
|              | 42.6      | 1125.4925               | PNITN Man1                     | Inf                   |     |
|              | 42.6      | 1287.5453               | PNITN Man2                     | Inf                   |     |
|              | 42.6      | 1611.6509               | PNITN Man4                     | Inf                   |     |
|              | 42.6      | 1773.7037               | PNITN Man5                     | Inf                   |     |
|              | 42.6      | 1935.7565               | PNITN Man6                     | Inf                   |     |
|              | 42.6      | 2097.8093               | PNITN Man7                     | Inf                   |     |
|              | 42.6      | 2259.8621               | PNITN Man8                     | Inf                   |     |
|              | 42.6      | 2421.9149               | PNITN Man9                     | Inf                   |     |
|              | 42.631    | 1449.5981               | PNITN Man3                     | Obs                   |     |
| N801         | 46.236    | 3854.7283               | KQIYKTPPKIDFGGFNFS G2F         | Obs                   |     |
|              | 46.369    | 3788.67                 | KQIYKTPPKIDFGGFNFS Man8        | Obs                   |     |
|              | 46.424    | 3626.6226               | KQIYKTPPKIDFGGFNFS GOF +96.0   | Obs                   |     |
|              | 46.5      | 3546.6176               | KQIYKTPPKIDFGGFNFS G1          | Inf                   |     |
|              | 46.5      | 3692.6755               | KQIYKTPPKIDFGGFNFS G1F         | Inf                   |     |
|              | 46.5      | 3708.6704               | KQIYKTPPKIDFGGFNFS G2          | Inf                   |     |
|              | 46.5      | 3950.7228               | KQIYKTPPKIDFGGFNFS Man9        | Inf                   |     |
|              | 46.506    | 3464.5644               | KQIYKTPPKIDFGGFNFS Man6        | Obs                   |     |
|              | 46.506    | 3626.6172               | KQIYKTPPKIDFGGFNFS Man7        | Obs                   |     |
|              | 46.509    | 3530.6227               | KQIYKTPPKIDFGGFNFS GOF         | Obs                   |     |
|              | 46.509    | 3733.7021               | KQIYKTPPKIDFGGFNFS GOF +GlcNAc | Obs                   |     |
|              | 46.538    | 3140.4588               | KQIYKTPPKIDFGGFNFS Man4        | Obs                   |     |
| N801         | 46.568    | 2978.406                | KQIYKTPPKIDFGGFNFS Man3        | Obs                   |     |
|              | 46.575    | 2654.3004               | KQIYKTPPKIDFGGFNFS Man1        | Obs                   |     |
|              | 46.581    | 2816.3532               | KQIYKTPPKIDFGGFNFS Man2        | Obs                   |     |
|              | 46.601    | 3302.5116               | KQIYKTPPKIDFGGFNFS Man5        | Obs                   |     |
|              | 46.668    | 3384.5648               | KQIYKTPPKIDFGGFNFS GO          | Obs                   |     |
|              | 46.966    | 3587.6442               | KQIYKTPPKIDFGGFNFS GO +GlcNAc  | Obs                   |     |
|              | 47.5      | 4145.8237               | KQIYKTPPKIDFGGFNFS A1F         | Inf                   |     |
|              | 47.5      | 4290.8612               | KQIYKTPPKIDFGGFNFS A2          | Inf                   |     |
|              | 47.5      | 4436.9191               | KQIYKTPPKIDFGGFNFS A2F         | Inf                   |     |
|              | 48.492    | 3999.7658               | KQIYKTPPKIDFGGFNFS A1          | Obs                   |     |
|              | N801      | 48.1                    | 3630.5282                      | YKTPPKIDFGGFNFS A1    | Inf |
|              |           | 48.1                    | 3776.5861                      | YKTPPKIDFGGFNFS A1F   | Inf |
| 48.1         |           | 3921.6236               | YKTPPKIDFGGFNFS A2             | Inf                   |     |
| 48.1         |           | 4067.6815               | YKTPPKIDFGGFNFS A2F            | Inf                   |     |
| 48.121       |           | 3485.4907               | YKTPPKIDFGGFNFS G2F            | Obs                   |     |
| 48.27        |           | 4145.822                | YKTPPKIDFGGFNFS Very complex   | Obs                   |     |
| 48.332       |           | 3419.4324               | YKTPPKIDFGGFNFS Man8           | Obs                   |     |
| 48.339       |           | 3323.4379               | YKTPPKIDFGGFNFS G1F            | Obs                   |     |
| 48.408       |           | 3257.3796               | YKTPPKIDFGGFNFS Man7           | Obs                   |     |
| 48.453       |           | 3364.4645               | YKTPPKIDFGGFNFS GOF+GlcNAc     | Obs                   |     |
| 48.462       |           | 3161.3851               | YKTPPKIDFGGFNFS GOF            | Obs                   |     |
| 48.499       |           | 3983.7666               | YKTPPKIDFGGFNFS Very complex   | Obs                   |     |
| N801         | 48.518    | 3095.3268               | YKTPPKIDFGGFNFS Man6           | Obs                   |     |
|              | 48.6      | 1716.8512               | YKTPPKIDFGGFNFS                | Inf                   |     |
|              | 48.6      | 2123.01                 | YKTPPKIDFGGFNFS (GlcNAc)2      | Inf                   |     |
|              | 48.6      | 3015.3272               | YKTPPKIDFGGFNFS GO             | Inf                   |     |
|              | 48.6      | 3177.38                 | YKTPPKIDFGGFNFS G1             | Inf                   |     |
|              | 48.6      | 3339.4328               | YKTPPKIDFGGFNFS G2             | Inf                   |     |
|              | 48.6      | 1919.9306               | YKTPPKIDFGGFNFS GlcNAc stump   | Inf                   |     |
|              | 48.6      | 2285.0628               | YKTPPKIDFGGFNFS Man1           | Inf                   |     |
|              | 48.6      | 2447.1156               | YKTPPKIDFGGFNFS Man2           | Inf                   |     |
|              | 48.6      | 2609.1684               | YKTPPKIDFGGFNFS Man3           | Inf                   |     |
|              | 48.6      | 2771.2212               | YKTPPKIDFGGFNFS Man4           | Inf                   |     |
|              | 48.6      | 3581.4852               | YKTPPKIDFGGFNFS Man9           | Inf                   |     |
| N343         | 48.623    | 3218.4066               | YKTPPKIDFGGFNFS GO+GlcNAc      | Obs                   |     |
|              | 48.647    | 2933.274                | YKTPPKIDFGGFNFS Man5           | Obs                   |     |
|              | 50.406    | 3614.5291               | NLCPFGEVFNAT Complex           | Obs                   |     |
|              | 51.783    | 2908.1464               | NLCPFGEVFNAT Man7              | Obs                   |     |
|              | 51.942    | 3136.2575               | NLCPFGEVFNAT G2F               | Obs                   |     |
|              | 52.073    | 2131.0262               | NLCPFGEVFNAT glyco             | Obs                   |     |
|              | 52.167    | 2421.988                | NLCPFGEVFNAT Man4              | Obs                   |     |
|              | 52.185    | 2259.9352               | NLCPFGEVFNAT Man3              | Obs                   |     |
|              | 52.229    | 2666.094                | NLCPFGEVFNAT GO                | Obs                   |     |
|              | 52.265    | 2746.0936               | NLCPFGEVFNAT Man6              | Obs                   |     |
|              | 52.3      | 3281.295                | NLCPFGEVFNAT A1                | Inf                   |     |
|              | 52.3      | 3572.3904               | NLCPFGEVFNAT A2                | Inf                   |     |
| 52.3         | 2828.1468 | NLCPFGEVFNAT G1         | Inf                            |                       |     |
| 52.3         | 2990.1996 | NLCPFGEVFNAT G2         | Inf                            |                       |     |
| 52.32        | 2974.2047 | NLCPFGEVFNAT G1F        | Obs                            |                       |     |
| 52.445       | 3015.2313 | NLCPFGEVFNAT GOF+GlcNAc | Obs                            |                       |     |
| 52.5         | 1935.8296 | NLCPFGEVFNAT Man1       | Inf                            |                       |     |
| 52.5         | 2097.8824 | NLCPFGEVFNAT Man2       | Inf                            |                       |     |
| 52.5         | 3070.1992 | NLCPFGEVFNAT Man8       | Inf                            |                       |     |
| 52.5         | 3232.252  | NLCPFGEVFNAT Man9       | Inf                            |                       |     |
| 52.575       | 2584.0408 | NLCPFGEVFNAT Man5       | Obs                            |                       |     |
| 52.632       | 2812.1519 | NLCPFGEVFNAT GOF        | Obs                            |                       |     |
| 53.304       | 3427.3529 | NLCPFGEVFNAT A1F        | Obs                            |                       |     |
| 53.961       | 3718.4483 | NLCPFGEVFNAT A2F        | Obs                            |                       |     |
| GP5          | 60.483    | 1861.7463               | GP5                            | Obs                   |     |

### Key to Glycan Structures

GlcNAc stump: ■

(GlcNAc)2: ■■

Man1: ■■●

Man2: ■■●●

Man3: ■■●●●

Man4: ■■●●●●

Man5: ■■●●●●●

Man6: ■■●●●●●●

Man7: ■■●●●●●●●

Man8: ■■●●●●●●●●

Man9: ■■●●●●●●●●●

GO: ■■●●●●

GO+GlcNAc: ■■●●●●■

GOF: ■■●●●●●

GO+GlcNAc: ■■●●●●●■

G1: ■■●●●●●●

G1F: ■■●●●●●●●

G1(F)2: ■■●●●●●●●●

G2: ■■●●●●●●●

G2F: ■■●●●●●●●●

A1: ■■●●●●●●●●

A1F: ■■●●●●●●●●●

A1F-Gal: ■■●●●●●●●●●●

A1F-Gal+GlcNAc: ■■●●●●●●●●●●■

A1(F)2-Gal+GlcNAc: ■■●●●●●●●●●●■

A2: ■■●●●●●●●●●●

A2F: ■■●●●●●●●●●●●

### Monosaccharide symbol

- Galactose
- Mannose
- ▲ Fucose
- N-Acetylglucosamine (GlcNAc)
- ◆ N-Acetylneuraminic acid (Neu5Ac)

The complete Spike PCDL database is available to download in .cdb or .xlsx format here:

[https://zenodo.org/record/3958218#.Xxn\\_BChKhoY](https://zenodo.org/record/3958218#.Xxn_BChKhoY)

**Figure 3.** Combined Extracted Ion Chromatogram (EIC) for 27 isoforms of glycopeptide GEVFNAT (N343) within +/- 2 min retention time window from RBD. Only three glycans are labelled, the remainder are listed in the accompanying table 2, below.

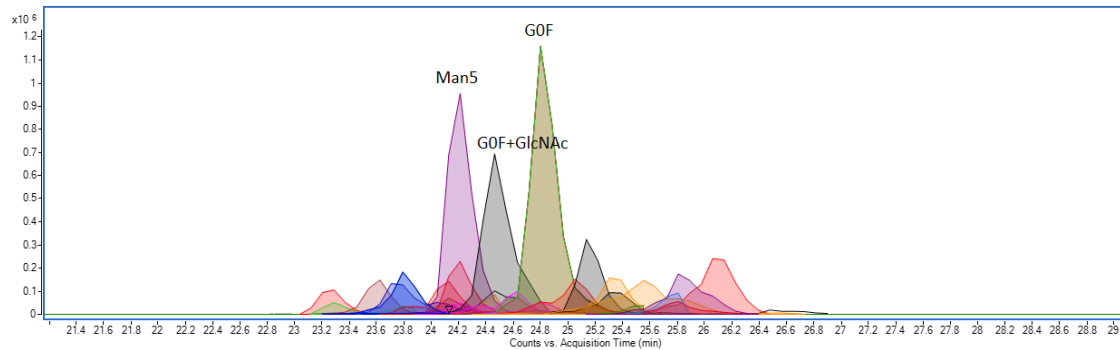

**Table 2.** GEVFNAT glycopeptide (N343) isoforms from RBD shown in Figure 3

| Name                       | Mass      | RT    | Volume   | ppm error | Name                      | Mass      | RT    | Volume   | ppm error |
|----------------------------|-----------|-------|----------|-----------|---------------------------|-----------|-------|----------|-----------|
| GEVFNAT Complex NeuAc (F)2 | 2838.1078 | 23.26 | 733674   | -0.2      | GEVFNAT G1F               | 2342.9180 | 24.62 | 1090359  | 3.4       |
| GEVFNAT Man8               | 2438.9113 | 23.30 | 744169   | 3.7       | GEVFNAT G0                | 2034.8089 | 24.80 | 950868   | 3.1       |
| GEVFNAT Man7               | 2276.8615 | 23.61 | 1867525  | 2.7       | GEVFNAT G0F               | 2180.8688 | 24.82 | 12980259 | 2.0       |
| GEVFNAT Complex NeuAc F    | 2692.0523 | 23.77 | 1266219  | 0.5       | GEVFNAT A1(F)2-Gal+GlcNAc | 2983.1427 | 24.91 | 732781   | 5.3       |
| GEVFNAT Man6               | 2114.8091 | 23.80 | 2432950  | 2.7       | (G)EVFNAT G0              | 1977.7887 | 25.05 | 2947447  | 2.5       |
| GEVFNAT G1(F)2             | 2488.9768 | 24.09 | 1292274  | 2.8       | GEVFNAT G0F+GlcNAc        | 2383.9464 | 25.16 | 3836871  | 2.6       |
| GEVFNAT G2F                | 2504.9755 | 24.14 | 1007345  | 1.3       | GEVFNAT A1F               | 2796.0641 | 25.33 | 1512501  | 3.6       |
| GEVFNAT Man4               | 1790.7051 | 24.20 | 3040952  | 2.3       | GEVFNAT A1(F)2-Gal+GlcNAc | 2983.1444 | 25.34 | 1320994  | 4.8       |
| GEVFNAT Man5               | 1952.7583 | 24.20 | 12492713 | 1.9       | GEVFNAT A1F-Gal           | 2634.0105 | 25.51 | 608358   | 4.1       |
| GEVFNAT Man3               | 1628.6504 | 24.20 | 666739   | 3.7       | GEVFNAT A2F               | 3087.1629 | 25.77 | 805142   | 2.2       |
| GEVFNAT G1F                | 2342.9183 | 24.37 | 1333546  | 3.3       | GEVFNAT A1F               | 2796.0644 | 25.80 | 541989   | 3.5       |
| GEVFNAT G0F                | 2180.8638 | 24.45 | 953034   | 4.3       | GEVFNAT A1F-Gal           | 2634.0125 | 25.86 | 3692097  | 3.4       |
| GEVFNAT G0F+GlcNAc         | 2383.9436 | 24.47 | 9038631  | 3.7       |                           |           |       |          |           |

Figure 4 illustrates a complete glycan fragmentation series for RBD glycopeptide GEVFNAT-Man5 showing the peptide stump (GEVFNAT-GlcNAc) and mannose ladders. Calculated mass errors are shown in table 3.

**Figure 4.** Complete glycan fragmentation series for RBD glycopeptide GEVFNAT-Man5 (N343)

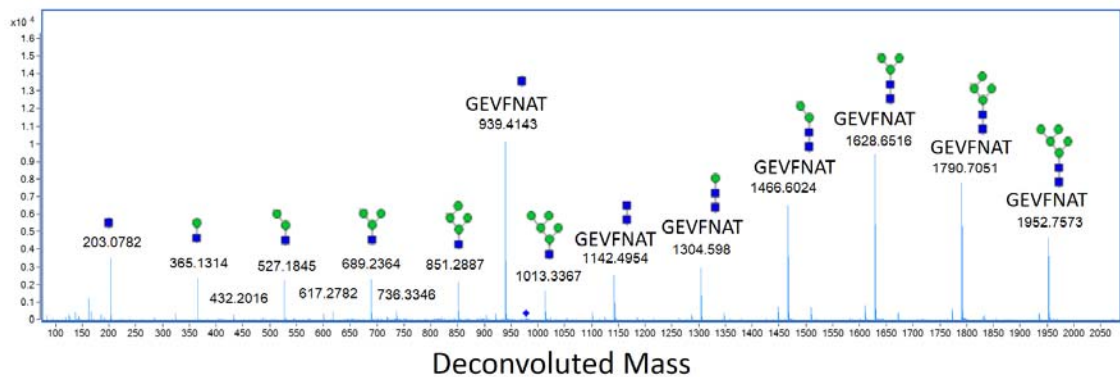

**Table 3.** Glycan assignment and mass errors (parts per million) for RDB glycopeptide GEVFNAT-Man5

| Deconvoluted Mass Obs | Formula                                                                                                                                                                                      | Mass Calc | ppm  | Assignment               |
|-----------------------|----------------------------------------------------------------------------------------------------------------------------------------------------------------------------------------------|-----------|------|--------------------------|
| 203.0782              | C <sub>8</sub> H <sub>13</sub> N O <sub>5</sub>                                                                                                                                              | 203.0794  | -5.9 | GlcNAc                   |
| 365.1314              | C <sub>8</sub> H <sub>13</sub> N O <sub>5</sub> (C <sub>6</sub> H <sub>10</sub> O <sub>5</sub> ) <sub>1</sub>                                                                                | 365.1322  | -2.2 | GlcNAc(Man)1             |
| 527.1845              | C <sub>8</sub> H <sub>13</sub> N O <sub>5</sub> (C <sub>6</sub> H <sub>10</sub> O <sub>5</sub> ) <sub>2</sub>                                                                                | 527.1850  | -0.9 | GlcNAc(Man)2             |
| 689.2364              | C <sub>8</sub> H <sub>13</sub> N O <sub>5</sub> (C <sub>6</sub> H <sub>10</sub> O <sub>5</sub> ) <sub>3</sub>                                                                                | 689.2364  | 0.0  | GlcNAc(Man)3             |
| 851.2887              | C <sub>8</sub> H <sub>13</sub> N O <sub>5</sub> (C <sub>6</sub> H <sub>10</sub> O <sub>5</sub> ) <sub>4</sub>                                                                                | 851.2907  | -2.3 | GlcNAc(Man)4             |
| 1013.3367             | C <sub>8</sub> H <sub>13</sub> N O <sub>5</sub> (C <sub>6</sub> H <sub>10</sub> O <sub>5</sub> ) <sub>5</sub>                                                                                | 1013.3435 | -6.7 | GlcNAc(Man)5             |
| 939.4143              | C <sub>32</sub> H <sub>48</sub> N <sub>8</sub> O <sub>12</sub> (C <sub>8</sub> H <sub>13</sub> N O <sub>5</sub> )                                                                            | 939.4185  | -4.5 | GEVFNAT (GlcNAc)         |
| 1142.4954             | C <sub>32</sub> H <sub>48</sub> N <sub>8</sub> O <sub>12</sub> (C <sub>8</sub> H <sub>13</sub> N O <sub>5</sub> ) <sub>2</sub>                                                               | 1142.4979 | -2.2 | GEVFNAT (GlcNAc)2        |
| 1304.5498             | C <sub>32</sub> H <sub>48</sub> N <sub>8</sub> O <sub>12</sub> (C <sub>8</sub> H <sub>13</sub> N O <sub>5</sub> ) <sub>2</sub> (C <sub>6</sub> H <sub>10</sub> O <sub>5</sub> ) <sub>1</sub> | 1304.5507 | -0.7 | GEVFNAT (GlcNAc)2 (Man)1 |
| 1466.6024             | C <sub>32</sub> H <sub>48</sub> N <sub>8</sub> O <sub>12</sub> (C <sub>8</sub> H <sub>13</sub> N O <sub>5</sub> ) <sub>2</sub> (C <sub>6</sub> H <sub>10</sub> O <sub>5</sub> ) <sub>2</sub> | 1466.6036 | -0.8 | GEVFNAT (GlcNAc)2 (Man)2 |
| 1628.6516             | C <sub>32</sub> H <sub>48</sub> N <sub>8</sub> O <sub>12</sub> (C <sub>8</sub> H <sub>13</sub> N O <sub>5</sub> ) <sub>2</sub> (C <sub>6</sub> H <sub>10</sub> O <sub>5</sub> ) <sub>3</sub> | 1628.6564 | -2.9 | GEVFNAT (GlcNAc)2 (Man)3 |
| 1790.7051             | C <sub>32</sub> H <sub>48</sub> N <sub>8</sub> O <sub>12</sub> (C <sub>8</sub> H <sub>13</sub> N O <sub>5</sub> ) <sub>2</sub> (C <sub>6</sub> H <sub>10</sub> O <sub>5</sub> ) <sub>4</sub> | 1790.7092 | -2.3 | GEVFNAT (GlcNAc)2 (Man)4 |
| 1952.7573             | C <sub>32</sub> H <sub>48</sub> N <sub>8</sub> O <sub>12</sub> (C <sub>8</sub> H <sub>13</sub> N O <sub>5</sub> ) <sub>2</sub> (C <sub>6</sub> H <sub>10</sub> O <sub>5</sub> ) <sub>5</sub> | 1952.7620 | -2.4 | GEVFNAT (GlcNAc)2 (Man)5 |

In the pseudo MS3 experiment glycans were lost by in-source decay. GEVFNAT-GlcNAc was isolated in the quadrupole and fragmented in the collision cell. Sequence confirmation for the peptide stump GEVFNAT-GlcNAc is shown in Figure 5 with mass errors calculated in Table 4.

**Figure 5.** Pseudo MS3 fragmentation analysis of RBD glycopeptide stump GEVFNAT-GlcNAc (N343)

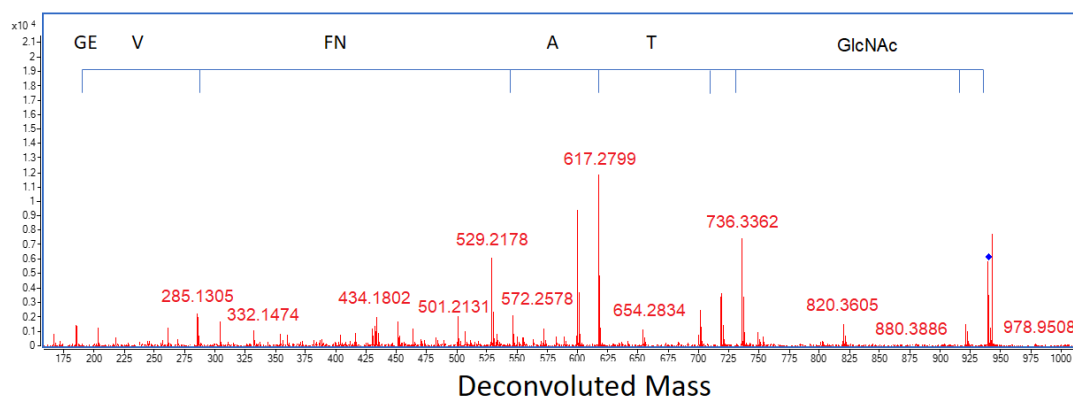

**Table 4.** Pseudo MS3 fragment ion assignment and mass errors (parts per million) for RBD glycopeptide stump GEVFNAT-GlcNAc (N343)

| Deconvoluted Observed Mass | Formula                                                                                                        | Calculated Mass | Error (ppm) | Fragment ion assignment      | Peptide Sequence |
|----------------------------|----------------------------------------------------------------------------------------------------------------|-----------------|-------------|------------------------------|------------------|
| 186.0645                   | C <sub>7</sub> H <sub>10</sub> N <sub>2</sub> O <sub>4</sub>                                                   | 186.0641        | 2.1         | b2                           | GE               |
| 285.1305                   | C <sub>12</sub> H <sub>19</sub> N <sub>3</sub> O <sub>5</sub>                                                  | 285.1325        | -7.0        | b3                           | GEV              |
| 546.2410                   | C <sub>25</sub> H <sub>34</sub> N <sub>6</sub> O <sub>8</sub>                                                  | 546.2438        | -5.1        | b5                           | GEVFN            |
| 617.2799                   | C <sub>28</sub> H <sub>39</sub> N <sub>7</sub> O <sub>9</sub>                                                  | 617.2809        | -1.6        | b6                           | GEVFNAT          |
| 718.3257                   | C <sub>32</sub> H <sub>46</sub> N <sub>8</sub> O <sub>11</sub>                                                 | 718.3286        | -4.0        | b7                           | GEVFNAT          |
| 736.3362                   | C <sub>32</sub> H <sub>48</sub> N <sub>8</sub> O <sub>12</sub>                                                 | 736.3392        | -4.1        | y7                           | GEVFNAT          |
| 939.4174                   | C <sub>32</sub> H <sub>48</sub> N <sub>8</sub> O <sub>12</sub> C <sub>8</sub> H <sub>13</sub> N O <sub>5</sub> | 939.4185        | -1.2        | M GlcNAc                     | GEVFNAT GlcNAc   |
| 921.4064                   | C <sub>32</sub> H <sub>46</sub> N <sub>8</sub> O <sub>11</sub> C <sub>8</sub> H <sub>13</sub> N O <sub>5</sub> | 921.408         | -1.7        | M GlcNAc - H <sub>2</sub> O  | GEVFNAT GlcNAc   |
| 820.3605                   | C <sub>28</sub> H <sub>39</sub> N <sub>7</sub> O <sub>9</sub> C <sub>8</sub> H <sub>13</sub> N O <sub>5</sub>  | 820.3603        | 0.2         | b6 GlcNAc - H <sub>2</sub> O | GEVFNAT GlcNAc   |
| 749.3213                   | C <sub>25</sub> H <sub>34</sub> N <sub>6</sub> O <sub>8</sub> C <sub>8</sub> H <sub>13</sub> N O <sub>5</sub>  | 749.3232        | -2.5        | b5 GlcNAc - H <sub>2</sub> O | GEVFNAT GlcNAc   |
| 701.3021                   | C <sub>32</sub> H <sub>43</sub> N <sub>7</sub> O <sub>11</sub>                                                 | 701.3021        | 0.0         | b7 - NH <sub>3</sub>         | GEVFNAT          |
| 600.2529                   | C <sub>28</sub> H <sub>36</sub> N <sub>6</sub> O <sub>9</sub>                                                  | 600.2544        | -2.5        | b6 - NH <sub>3</sub>         | GEVFNAT          |
| 529.2178                   | C <sub>25</sub> H <sub>31</sub> N <sub>5</sub> O <sub>8</sub>                                                  | 529.2173        | 0.9         | b5 - NH <sub>3</sub>         | GEVFNAT          |

Intact mass measurement of fully glycosylated Spike was unsuccessful due to the polydispersity of its innumerable glycoforms and the resulting dilution of ion signal. However, the smaller receptor binding domain, bearing only two glycosylation sites did prove amenable to intact mass analysis. Figure 6 shows twenty-one glycoforms for intact RBD, of which ten major glycoforms could be assigned. This showed that the principal glycan species were Man5, G0F and G0F+GlcNAc which was in agreement with the glycopeptide analysis.

**Figure 6.** Intact mass analysis of RBD showing the principal glycan species Man5, G0F and G0F+GlcNAc in agreement with glycopeptide analysis. (This method cannot differentiate individual glycosylation sites, hence when two structures are possible, both are shown)

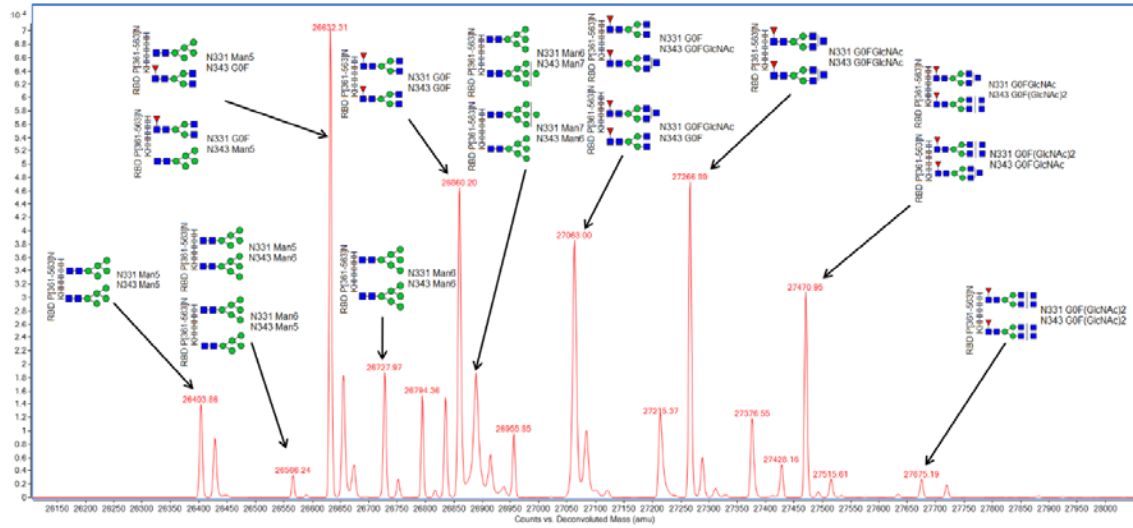

Elastase was chosen as a single digestion enzyme because it was judged to give the best chance of generating glycopeptides with a single NXS/T motif, essential for unambiguous glycan mapping. For non-glycosylated Spike peptides, elastase generated 63 high quality MSMS hits and 26% coverage allowing for five missed cleavages. The same data searched for non-specific cleavage gave 135 high quality MSMS hits and 48% coverage allowing for twenty missed cleavages. Elastase itself contains 2 NXS/T motifs. We therefore prepared elastase only, at x10 the usual concentration, searched the resulting LC-MS data using the PCDL as a control, and no hits were found. The Spike protein LC-MS data did contain a small number of elastase autodigestion peptides.

## Methods

### *Cloning, expression and purification of Spike*

The gene encoding amino acids 1-1208 of the SARS-CoV-2 Spike glycoprotein ectodomain (S), with mutations of RRAR > GSAS at residues 682-685 (to remove the furin cleavage site) and KV > PP at residues 986-987 (to stabilise the protein), was synthesised with a C-terminal T4 fibrin trimerization domain, HRV 3C cleavage site, 8xHis tag, and Twin-Strep-tag [5]. The construct was sub-cloned into pHL-sec [10] using the AgeI and XhoI restriction sites and the sequence was confirmed by sequencing. Recombinant Spike was produced in *Expi293F*<sup>TM</sup> cells by transient transfection with purified DNA (0.5 mg/L cells) using a 1:6 DNA:L-PEI ratio, mixed in minimal medium, and sodium butyrate as an additive. Cells were grown in suspension in *FreeStyle293*<sup>TM</sup> medium with shaking at 150 rpm in 2 L smooth roller bottles, filled with 0.5 L cells at 2 e<sup>6</sup>/mL per bottle at 30°C with 8% CO<sub>2</sub> and 75% humidity. Supernatants from transfected cells were harvested 3-days post-transfection by centrifugation. Clarified supernatant was mixed with Ni<sup>2+</sup> IMAC *Sepharose*<sup>®</sup> 6 *Fast Flow* (GE; 2 mL bed volume per L of supernatant) at room temperature for 2 h. Using a gravity flow column, resin

was collected and washed stringently with 50 CV each of base buffer (1X PBS), WB25 (BB + 25 mM imidazole), and WB40 (BB+ 40 mM imidazole), followed by elution with EB (0.30 M imidazole in 1X PBS). Protein was dialyzed into 1X PBS using *SnakeSkin*<sup>™</sup> 3,500 MWCO dialysis tubing, concentrated to 1 mg/mL using a 100,000 MWCO *VivaSpin* centrifugal concentrator (GE), and centrifuged at 21,000 x g for 30 min to remove aggregates. The trimeric Spike protein was flash frozen in LN<sub>2</sub> and stored at -80°C until use. Final purified yield was 1 mg of Spike protein per L of transfected cells.

#### *Cloning, expression and purification of Receptor Binding Domain*

The receptor binding domain (RBD; aa 330-532) of SARS-CoV-2 Spike (Genbank MN908947) was inserted into the pOPINTTNeo expression vector fused to an N-terminal signal peptide and a C-terminal 6xHis tag [11]. RBD was produced by transient transfection in *Expi293F*<sup>™</sup> cells (*ThermoFisher Scientific*, UK) using purified DNA (1.0 mg/L cells), a 1:3 DNA:L-PEI ratio, and sodium butyrate as an additive. Cells were grown in suspension in *FreeStyle293*<sup>™</sup> expression medium at 37°C with 8% CO<sub>2</sub> and 75% humidity. Supernatants from transfected cells were harvested 3-days post-transfection and the supernatant was collected by centrifugation. Clarified supernatant was incubated with 5 mL of Ni<sup>2+</sup> IMAC *Sepharose*<sup>®</sup> 6 *Fast Flow* (GE) at room temperature for 2 h. Using gravity flow, resin was washed with 50 CV of base buffer (1X PBS) and 50 CV of WB (1X PBS + 25 mM imidazole) before elution with EB (0.5 M imidazole in 1X PBS). Protein was concentrated using a 10,000 MWCO *Amicon Ultra-15* before application to a *Superdex 75 16/600* column pre-equilibrated with 1X PBS pH 7.4. Peak monomeric fractions were pooled and concentrated to 2 mg/mL, flash frozen in LN<sub>2</sub>, and stored at -80°C until use. Final purified yield was >15 mg RBD per L of transfected cells.

#### *Sample preparation*

SARS-CoV-2 Spike or RBD-6H at 1 mg/mL in PBS were prepared in aliquots of either 20 µL or 80 µL and diluted 1 in 3 in 100 mM ammonium bicarbonate, pH 8.0, followed by reduction by addition of 1, 4 Dithiothreitol (DTT) to 5 mM and incubation 37°C for 1 h. Next, the protein was alkylated by addition of iodoacetamide (IAA) to 15 mM and incubation in the dark for 30 min. This was followed by overnight digestion using elastase (*Promega*) at a ratio of 1:20 (w/w). The following day, the supernatant was dried using a rotary evaporator, and re-suspended in 60 µL of 0.1% formic acid for injection into the LC-MS.

#### *'Analytical mode' LC-MS glycopeptide data acquisition*

LC-MS 'analytical mode' was performed using a *1290 Infinity* UHPLC coupled to a *G6530A* ESI QTOF mass spectrometer (*Agilent Technologies*). TOF and quadrupole were calibrated prior to analysis and the reference ion 922.0098m/z was used for continuous mass correction. Sample was introduced using a 50 µL full-loop injection. Reversed phase chromatographic separation was achieved using an *AdvancedBio Peptide* reversed phase 2.7 µm particle, 2.1 mm x 100 mm column 655750-902 (*Agilent Technologies*). Mobile phase A was 0.1% formic acid in water and mobile phase B 0.1% formic acid in methanol (*Optima* LC-MS grade, *Fisher*). Initial conditions were 5% B and 0.200 mL/min flow rate. A linear gradient from 5% B - 60% B was applied over 60 min, followed by isocratic elution at 100% B for 2 min returning to initial conditions for a further 2 min. Post time was 10 min. MS source parameters were drying gas temperature 350°C, drying gas 8 L/min, nebulizer 30 psi, capillary 4000 V, fragmentor 150 V. MS spectrum range was 100 – 3200 m/z (centroid only), 2 GHz Extended Dynamic range, with the instrument in positive ion mode.

#### *LC-MSMS glycopeptide data acquisition 'discovery mode'*

LC-MSMS 'discovery mode' was performed as described above, with the following changes: Soft CID collision energy parameters for MSMS were slope 1.0, intercept 0 using argon as the collision gas (if using nitrogen slope 2.0, intercept 0) were used to favour glycan fragmentation over peptide



fragmentation for glycopeptides. Sufficient non-glycosylated peptides were fragmented to give reasonable sequence coverage. Care was taken to reduce sodium and potassium contamination where possible and Tris buffers were avoided as these adducts interfere with glycopeptide analysis.

#### LC-MS glycopeptide data analysis ‘analytical mode’

Analysis only required retention time and accurate mass data using the Spike PCDL database created as described below. This is possible either using the *Agilent* software described, software provided by other vendors, or by manual inspection. In our case, we used *Masshunter Qualitative Analysis* version B.07 (*Agilent Technologies*) and the Molecular Feature Extraction tool to extract H<sup>+</sup>, Na<sup>+</sup> and K<sup>+</sup> adducts and charge states +1 to +5. Briefly, this tool identifies and associates common spectral features such as carbon isotopes, adducts and multiple charge states as belonging to same Compound (peptide) by virtue of sharing the same accurate mass and retention time, then combines these features together to give a mass, retention time and volume for each compound. Compounds were then searched against Spike PCDL using a mass error window +/- 10 ppm and a retention time window +/- 2 min. Some filtering of the data was used to reduce the number of compounds and thence speed-up the PCDL search. Relative quantitation of each glycan on a particular glycopeptide could then be assessed.

#### LC-MSMS glycopeptide analysis “discovery mode”

Construction of the Spike glycopeptide mass-retention time database (“discovery mode”) was more complex and time-consuming, but once constructed and made available to the scientific community, there is no further need to repeat this step. By using reverse phase HPLC, glycopeptides are separated by the relatively hydrophobic peptide moiety, whereas the associated hydrophilic glycans are grouped together by retention time as illustrated in figure 7.

**Figure 7.** LC-MSMS “discovery” mode used to generate the Spike glycopeptide Mass-Retention Time PCDL database

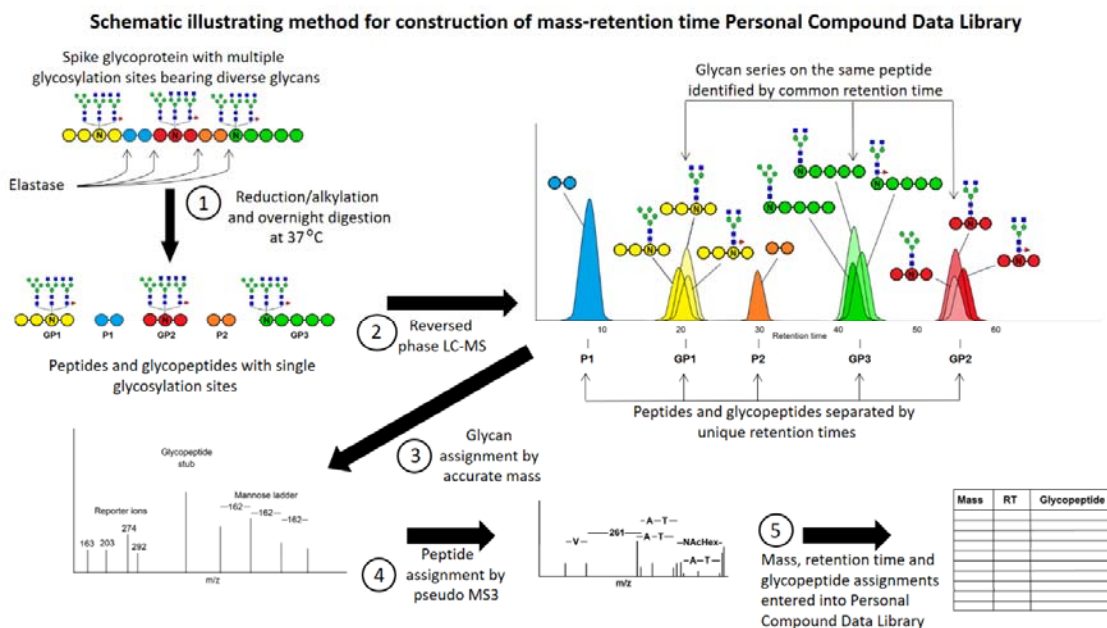

Initial LC-MSMS discovery mode data for incorporation into a glycopeptide PCDL was performed using *Masshunter Qualitative Analysis* with *Bioconfirm* B.07.00 (*Agilent Technologies*). Compounds were identified using the Find by Molecular Feature (MFE) tool looking for H<sup>+</sup>, Na<sup>+</sup> and K<sup>+</sup> adducts

and charge states +2 to +5. The results were filtered to remove compounds <1000 Da (too small to be glycopeptides). Compound MSMS spectra were screened manually for the following oxonium reporter ions: Hex  $m/z$  163.0601, HexNAc  $m/z$  204.0866, HexHexNAc  $m/z$  366.1395, Neu5Ac  $m/z$  274.0921/  $m/z$  291.0949 and/or a Hexose ladder  $m/z$  162.0528 Da. High quality  $m/z$  spectra were deconvoluted to neutral mass spectra with glycan *de novo* interpretation performed manually. Once a glycopeptide had been identified, it was entered into a personal compound data library database (PCDL, *Agilent Technologies*) as a mass and retention time. In addition, the database made use of known mammalian N-linked glycan processing. After the initial glycopeptide identification, other processed glycopeptides, which were considered likely to also be present, were added to the database at the same retention time and with a calculated mass. For example, if a glycopeptide with Man5 was identified by MSMS, Man1-9 and G0/F were added at the same retention time. If these glycans were subsequently found in the data, their actual retention times were updated, and the next round of processing to more complex glycans was added, in order to produce the most comprehensive PCDL possible, while still being manageable. Processing order:

Man(n) → G0/F → G1/F → G2/F → A1/F → A2/F → Very Complex

Valid glycan identifications resulted in a calculated peptide mass that could be matched to the sequence. Where high quality spectra were present, a peptide-GlcNAc stump was observed (Figure 4). This was used in a pseudo MS3 experiment with manual peptide *de novo* interpretation to confirm the peptide sequence (Figure 5). Mass data adjacent to the glycopeptide retention time was then searched for neutral differences corresponding to glycans, for example, Man5 → G0F or Man7 → G2F has a neutral delta mass of 228.1111 Da.

As expected, not all species could be matched to the sequence, presumably due to unexpected modifications. In this case, they were added to the database as 'GP' with an identifying number and as much information as could be extracted. Data for the most likely glycan was added to the PCDL, including a deconvoluted mass MSMS spectra were available, using nomenclature generating the most easily readable format.

A second round of glycopeptide discovery used *Bioconfirm* v10.0 data analysis software (*Agilent Technologies*). Sequences were matched by peptide accurate mass using the following parameters: peptide cleavage nonspecific, number of missed cleavages 20, N-linked modifications Man3, Man5-9, G0, G0F, G0F GlcNAc, G1, G1F, G2, G2F. Any peptide bearing the glycosylation motif NXS/T with two or more glycan hits within a retention time window +/-2 min was added to the PCDL, excepting missed cysteine alkylations.

In-source fragmentation due to glycopeptide ions absorbing excess energy could be identified in the MS by searching extracted ion chromatograms (EICs) of the oxonium reporter ions and also by related glycopeptides appearing with exactly the same retention times. Both were observed infrequently and at manageable levels.

#### *Intact mass analysis*

Concentrated protein samples were diluted to 0.02 mg/mL in 0.1% formic acid and 50  $\mu$ L was injected on to a 2.1 mm x 12.5 mm *Zorbax* 5  $\mu$ m 300SB-C3 guard column (*Agilent Technologies*) housed in a column oven set at 40°C. The solvent system used consisted of 0.1% formic acid (solvent A) and 0.1% formic acid in methanol (solvent B). Chromatography was performed as follows: Initial conditions were 90% A and 10% B and a flow rate of 1.0 mL/min. A linear gradient from 10% B to 80% B was applied over 35 seconds. Elution then proceeded isocratically at 95% B for 40 seconds followed by equilibration at initial conditions for a further 15 seconds. The mass spectrometer was configured with the standard ESI source and operated in positive ion mode. The ion source was operated with the capillary voltage at 4000 V, nebulizer pressure at 60 psig, drying gas at 350°C and

drying gas flow rate at 12 L/min. The instrument ion optic voltages were as follows: fragmentor 250 V, skimmer 60 V and octopole RF 250 V.

## Discussion

Glycoprotein analysis is difficult. It is either performed in biopharmaceutical laboratories with proprietary expertise of glycan analysis on simple glycoproteins, such as immunoglobulins, or performed by a handful of academic labs with experience of glycan discovery from complex glycoproteins. Many protein researchers choose to ignore it, manipulating cell lines such that they cannot process beyond Man5, or to remove glycans entirely by mutation at the glycosylation motif or enzymatically [12]. While this approach has its merits, it has exposed a serious weakness in analytical capability when faced with a pathogen such as SARS-CoV-2 whose ability to evade the immune system is dependent upon heavy and complex glycosylation.

We have chosen an approach relying on elastase digestion to generate glycopeptides bearing a single glycan but with a sufficient number of amino acid residues to enable chromatographic separation by reversed-phase HPLC, as well as confident identification by accurate mass or *de novo* sequencing. Our choice of reversed phase HPLC has excellent discrimination for short elastase peptides, whereas glycans show little or no interaction with the column. Thus, species originating from a single glycosylation site with the same peptide sequence but several different glycans, eluted with the same retention time and could be discriminated by mass spectrometry. We used reversed phase HPLC and MSMS to characterise as many glycopeptides as possible. Although this required complex and time-consuming data analysis, it needed only be performed once, with the goal of building an accurate mass-retention time database for all observed Spike glycopeptides. Provided the same HPLC column and mobile phase conditions are used, retention times should not vary significantly. Thus, working in the analytical mode we describe, glycan structure and peptide sequence is assigned confidently, by accurate mass and retention time alone. LC-MS data need only to be searched against the mass-retention time database, and peak areas recorded, to generate a complete characterisation of Spike glycans.

We believe the MRTF method described here has advantages over other approaches to Spike glycan analysis. Previous studies relied upon very expensive equipment and software unavailable in most analytical laboratories. Working in 'analytical' mode, all that is necessary is to reproduce the chromatography, hence our method is a generic one, which can be run using any HPLC coupled to any accurate mass instrument and is not restricted to specific proprietary data analysis software. We used PCDL and *Masshunter*, but MRTF analysis can be performed on any vendor software or manually. Moreover, it demands no specialised expertise in glycobiology, and is thus accessible to many more researchers. Some published methods require multiple specific endoproteases, some of which cannot be readily sourced. Our method uses a single enzyme, elastase, which is inexpensive and widely available. Nor does it rely on glycosidases, which may not work efficiently and do not cleave O-linked glycans.

Our data contains an excess of glycopeptides with the motif (y)nNxS/T. This appears to be a very convenient function of elastase on glycopeptides, because the presence of the motif at the C-terminus facilitates *de novo* sequencing. We would be interested to know if this cleavage bias towards the C-terminus of the glycan motif is reproducible in other labs and whether it indicates steric hindrance within the elastase enzyme structure. If such bias is real, then these peptides are less likely to be a false positive result.

Receptor binding domain (RBD) from Spike protein is of interest in many labs for development of serological tests or neutralising antibodies. Because the yield of RBD was five times higher than Spike and more was initially available, we used it for method optimisation, and since it bears only two glycosylation sites which are also present on Spike, it functioned as a useful model. Consequently, N343 on glycopeptide GEVFNAT is over-represented in our demonstration PCDL. We consistently

observed the same three major glycans (Man5, G0F and G0F+GluNAc) on this peptide and these were also in agreement with intact mass analysis of RBD protein as shown in Figure 6. On closer inspection, glycans up to A2F could also be observed at lower levels. We suspect that sufficiently detailed analysis may reveal all possible glycan structures with low abundance at all available sites. The most important would therefore be the top three to five glycans. If the complete complement of Spike protein glycoforms proves too challenging for a single analysis, this site, which is the most complete, would make a good proxy for total glycosylation.

We acknowledge that the mass-retention time fingerprinting method described, like all database searching methods, is dependent on the reproducibility of the enzyme digestion and both the quality and the completeness of database being searched. The example PCDL database reported here is provided as a demonstration. Due to glycan complexity and the likely absence of specific glycans within the Spike batches prepared by us, it will always be incomplete. Moreover, individual glycopeptides were identified with variable degrees of certainty, and we recommend that they should be validated by the user. As with all glycan analysis methods, there is a bias towards glycopeptides that are easiest to identify by the techniques used, and such bias will also be reflected within the database. Once the PDCL has been created, it must be refined and extended over time to improve data quality, and it is our intention to do so.

## References

1. Zhang, Y., et al., *Site-specific N-glycosylation Characterization of Recombinant SARS-CoV-2 Spike Proteins using High-Resolution Mass Spectrometry*. bioRxiv, 2020.
2. Solá, R.J. and K. Griebenow, *Glycosylation of therapeutic proteins*. BioDrugs, 2010. **24**(1): p. 9-21.
3. Vugmeyster, Y., et al., *Pharmacokinetics and toxicology of therapeutic proteins: advances and challenges*. World journal of biological chemistry, 2012. **3**(4): p. 73.
4. Tortorici, M.A. and D. Veessler, *Structural insights into coronavirus entry*. Advances in virus research, 2019. **105**: p. 93-116.
5. Wrapp, D., et al., *Cryo-EM structure of the 2019-nCoV spike in the prefusion conformation*. Science, 2020. **367**(6483): p. 1260-1263.
6. Yang, T.-J., et al., *Cryo-EM analysis of a feline coronavirus spike protein reveals a unique structure and camouflaging glycans*. Proceedings of the National Academy of Sciences, 2020.
7. Shajahan, A., et al., *Deducing the N-and O-glycosylation profile of the spike protein of novel coronavirus SARS-CoV-2*. bioRxiv, 2020.
8. Watanabe, Y., et al., *Site-specific analysis of the SARS-CoV-2 glycan shield*. BioRxiv, 2020.
9. Yao, H., et al., *Molecular architecture of the SARS-CoV-2 virus*. bioRxiv, 2020: p. 2020.07.08.192104.
10. Aricescu, A.R., W. Lu, and E.Y. Jones, *A time-and cost-efficient system for high-level protein production in mammalian cells*. Acta Crystallographica Section D: Biological Crystallography, 2006. **62**(10): p. 1243-1250.
11. Nettleship, J.E., et al., *Transient expression in HEK 293 cells: an alternative to E. coli for the production of secreted and intracellular mammalian proteins*, in *Insoluble proteins*. 2015, Springer. p. 209-222.
12. Chang, V.T., et al., *Glycoprotein structural genomics: solving the glycosylation problem*. Structure, 2007. **15**(3): p. 267-273.

## Acknowledgements

The authors wish to thank Professor David Harvey for critical reading of the manuscript and for helpful comments. We thank Professor Ray Owens for kindly providing the RBD-6H construct and Professor Gavin Screaton and Dr. Juthathip Mongkolsapaya for kindly providing the Spike construct. AdvancedBio Peptide HPLC column was a gift from Agilent Technologies. This project has received

*funding from the Innovative Medicines Initiative 2 Joint Undertaking (JU) under grant agreement No 875510. The JU receives support from the European Union's Horizon 2020 research and innovation programme and EFPIA and Ontario Institute for Cancer Research, Royal Institution for the Advancement of Learning McGill University, Kungliga Tekniska Hogskolan, Diamond Light Source Limited. The SGC is a registered charity (number 1097737) that receives funds from AbbVie, Bayer Pharma AG, Boehringer Ingelheim, Canada Foundation for Innovation, Eshelman Institute for Innovation, Genentech, Janssen, Merck KGaA, Darmstadt, Germany, MSD, Ontario Ministry of Research, Innovation and Science (MRIS), Pfizer, São Paulo Research Foundation-FAPESP, Takeda, and Wellcome [106169/ZZ14/Z].*
